# Supplementary material for: Solid Phase Synthesis of an Insect Pyrokinin Analog Incorporating an Imidazoline Ring as Isosteric Replacement of a <em>trans</em> Peptide Bond
Source: Preprints.org preprint supplement (doi:10.20944/preprints202104.0518.v1), 2021-04-19
Supplement: Supplementary file 1 [file supplementary]

Archive with 1 entries (1 files):
- SI KK RJN.pdf
